# Supplementary material for: The Phthalic Selenoanhydride Decreases Rat Blood Pressure and Tension of Isolated Mesenteric, Femoral and Renal Arteries
Source: MDPI journal article supplement (doi:10.3390/molecules28124826), 2023-06-17
Supplement: s1 [file s1]

## Supplementary material

to

### The Phthalic Selenoanhydride Decreases Rat Blood Pressure and Tension of Isolated Mesenteric, Femoral and Renal Arteries

Peter Balis <sup>1,\*</sup>, Andrea Berenyiova <sup>1</sup>, Anton Misak <sup>2</sup>, Marian Grman <sup>2</sup>, Zuzana Rostakova <sup>3</sup>, Iveta Waczulikova <sup>4</sup>, Sona Cacanyiova <sup>1</sup>, Enrique Domínguez-Álvarez <sup>5</sup> and Karol Ondrias <sup>2</sup>

- 1 Institute of Normal and Pathological Physiology, Centre of Experimental Medicine, Slovak Academy of Sciences, 841 04 Bratislava, Slovakia; andrea.berenyiova@savba.sk (A.B.); sona.cacanyiova@savba.sk (S.C.)
  - 2 Institute of Clinical and Translational Research, Biomedical Research Center, Slovak Academy of Sciences, 845 05 Bratislava, Slovakia; anton.misak@savba.sk (A.M.); marian.grman@savba.sk (M.G.); karol@ondrias.sk (K.O.)
  - 3 Institute of Measurement Science, Slovak Academy of Sciences, Dubravská cesta 9, 841 04 Bratislava, Slovakia; zuzana.rostakova@savba.sk
  - 4 Faculty of Mathematics, Physics and Informatics, Comenius University, Mlynska dolina F1, 842 48 Bratislava, Slovakia; iveta.waczulikova@fmph.uniba.sk
  - 5 Instituto de Química Orgánica General (IQOG), Consejo Superior de Investigaciones Científicas CSIC, Juan de la Cierva 3, 28006 Madrid, Spain; e.dominguez-alvarez@iqog.csic.es
- \* Correspondence: peter.balis@savba.sk

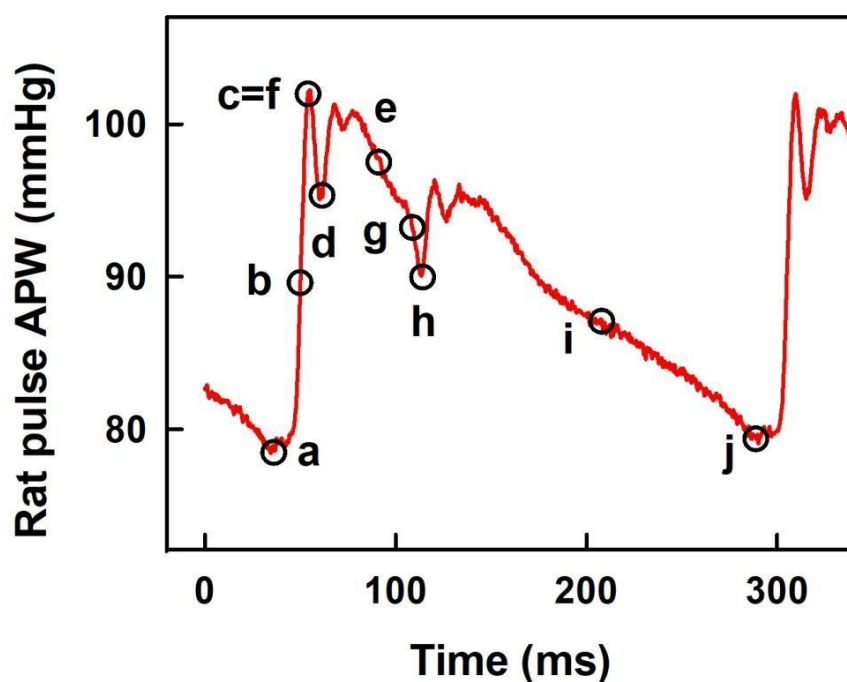

**Figure S1.** The left common carotid artery pulse waveform (APW) in the anesthetized rat. Control APW with marked ten points a - j (black circles).

### Description of 35 APW parameters (APW-Ps) from APW.

Ten points **a - j** (in bold letters) are from Figure S1 and they mark the values of BP and time that are used to define (calculate) specific APW-Ps

- (a) Systolic blood pressure in mmHg; point **c** or **f**, **point with maximal mmHg**.
- (b) Heart rate in  $\text{min}^{-1}$ ;  $60 / (j - a)$ ;  $(j - a)$  represents time interval between **a** and **j**, **a** and **j** are two reference points to diastolic BP value.
- (c) Systolic area in mmHg s; integral BP of **a** to **h**; **h** refers to BP at the dicrotic notch (dicrotic BP).
- (d)  $dP/dt_{\max}$  in mmHg  $\text{ms}^{-1}$ ; maximum derivative at the point **b**; **P** is BP in mmHg.
- (e)  $dP/dt_{\max}$  relative level; relative level (RL) of point **b**;  $(b - a) / (c \text{ (or } f) - a)$  in mmHg/mmHg (dimensionless).
- (f)  $dP/dt_d$  in mmHg  $\text{ms}^{-1}$ ; negative derivative at the point **i**; the point **i** is the BP in the middle of the time interval between **h** and **j**.
- (g)  $dP/dt_d$  relative level, relative level of point **i**;  $(i - a) / (c \text{ (or } f) - a)$  in mmHg/mmHg (dimensionless).
- (h)  $dP/dt_d - dP/dt_{\max}$  in s; time interval between **b** and **i**,  $dP/dt_d - dP/dt_{\max} = (i - b)$ .
- (i)  $dP/dt_d - dP/dt_{\min}$  in s; time interval between **g** and **i**,  $dP/dt_d - dP/dt_{\min} = (i - g)$ ;  $dP/dt_{\min}$  is maximum negative derivative at the point **g**.
- (j) Diastolic blood pressure in mmHg; the point **a** or **j**.
- (k) Pulse BP in mmHg;  $(c - a)$  or  $(f - a)$ .
- (l) Diastolic area in mmHg s; integral BP of **h** to **j**.
- (m)  $dP/dt_{\min}$  in mmHg  $\text{ms}^{-1}$ ;  $dP/dt_{\min}$  is maximum negative derivative at the point **g**.
- (n)  $dP/dt_{\min}$  relative level, relative level of point **g**;  $(g - a) / (c \text{ (or } f) - a)$  in mmHg/mmHg (dimensionless).
- (o)  $dP/dt_{\min}$  delay in s; delay in s of point **g**;  $(g - a)$  time interval between **a** and **g**.
- (p)  $dP/dt_d$  delay in s; delay in s of point **i**;  $(i - a)$  time interval between **a** and **i**.
- (q)  $dP/dt_d - dP/dt_{\max}$  in mmHg;  $(i - b)$  BP difference between **b** and **i**.
- (r)  $dP/dt_d - dP/dt_{\min}$  in mmHg;  $(i - g)$  BP difference between **g** and **i**.
- (aa) Systolic blood pressure in mmHg; point **c** or **f**. Plot (aa) is the same as (a).
- (bb) Anacrotic notch in mmHg; BP at the point **d**.
- (cc) Anacrotic notch relative level; relative level of point **d**;  $(d - a) / (c \text{ (or } f) - a)$  in mmHg/mmHg (dimensionless).
- (dd) Anacrotic notch delay in ms; delay in ms of point **d**;  $(d - a)$  time interval between **a** and **d**.
- (ee) Anacrotic notch relative delay; relative delay (RD) of point **d**;  $(d - a) / (j - a)$  in ms/ms (dimensionless)
- (ff) [Dicrotic notch (DiN) in s] - [Anacrotic notch (AnN) in s] in s;  $(h - d)$  time interval between **d** and **h**.
- (gg)  $[(DiN - AnN) \text{ in s}] / [dP/dt_{\min} \text{ in mmHg } \mu\text{s}^{-1}] \text{ in s/mmHg } \mu\text{s}^{-1}$ ;  $(h - d) / g$ .
- (hh)  $[(DiN - AnN) \text{ in s}] / [dP/dt_{\max} \text{ in mmHg } \mu\text{s}^{-1}] \text{ in s/mmHg } \mu\text{s}^{-1}$ ;  $(h - d) / b$ .
- (ii)  $[AnN \text{ in ms}] - [1\text{Max (point } c \text{ or the 1st. maximum) in ms}] \text{ in ms}$ ;  $(d - c)$  time interval between **c** and **d**.
- (jj) Augmentation index relative;  $(f - c) / (f - a)$  in mmHg/mmHg (dimensionless)\*\*.
- (kk) Dicrotic notch in mmHg; BP at the point **h**.
- (ll) Dicrotic notch relative level; relative level of point **h**;  $(h - a) / (c \text{ (or } f) - a)$  in mmHg/mmHg (dimensionless).
- (mm) Dicrotic notch delay in ms, delay in ms of point **h**;  $(h - a)$ .time interval between **a** and **h**.
- (nn) Dicrotic notch relative delay; relative delay of point **h**;  $(h - a) / (j - a)$ ; in ms/ms (dimensionless)
- (oo)  $[DiN \text{ in mmHg}] - [AnN \text{ in mmHg}] \text{ in mmHg}$ ;  $(h - d)$  BP difference between **d** and **h**;
- (pp)  $[(DiN - AnN) \text{ in mmHg}] / [dP/dt_{\min} \text{ in mmHg } \text{ms}^{-1}] \text{ in mmHg/mmHg } \text{ms}^{-1}$ ;  $(h - d) / g$ ;
- (qq)  $[(DiN - AnN) \text{ in mmHg}] / [dP/dt_{\max} \text{ in mmHg } \text{ms}^{-1}] \text{ in mmHg/mmHg } \text{ms}^{-1}$ ;  $(h - d) / b$ .

(rr) [AnN in mmHg] – [1Max (point **c** or the 1st. maximum) in mmHg] in mmHg; (**d – c**) BP difference between **c** and **d**.

\*Units in plots (gg), (hh), (pp) and (qq) are informative only.

\*\*The plot of augmentation index relative (**jj**) was not possible to determine in cases when the highest point at APW (Figure S1A) was “c” and not “f” and it was set to zero [1,2]

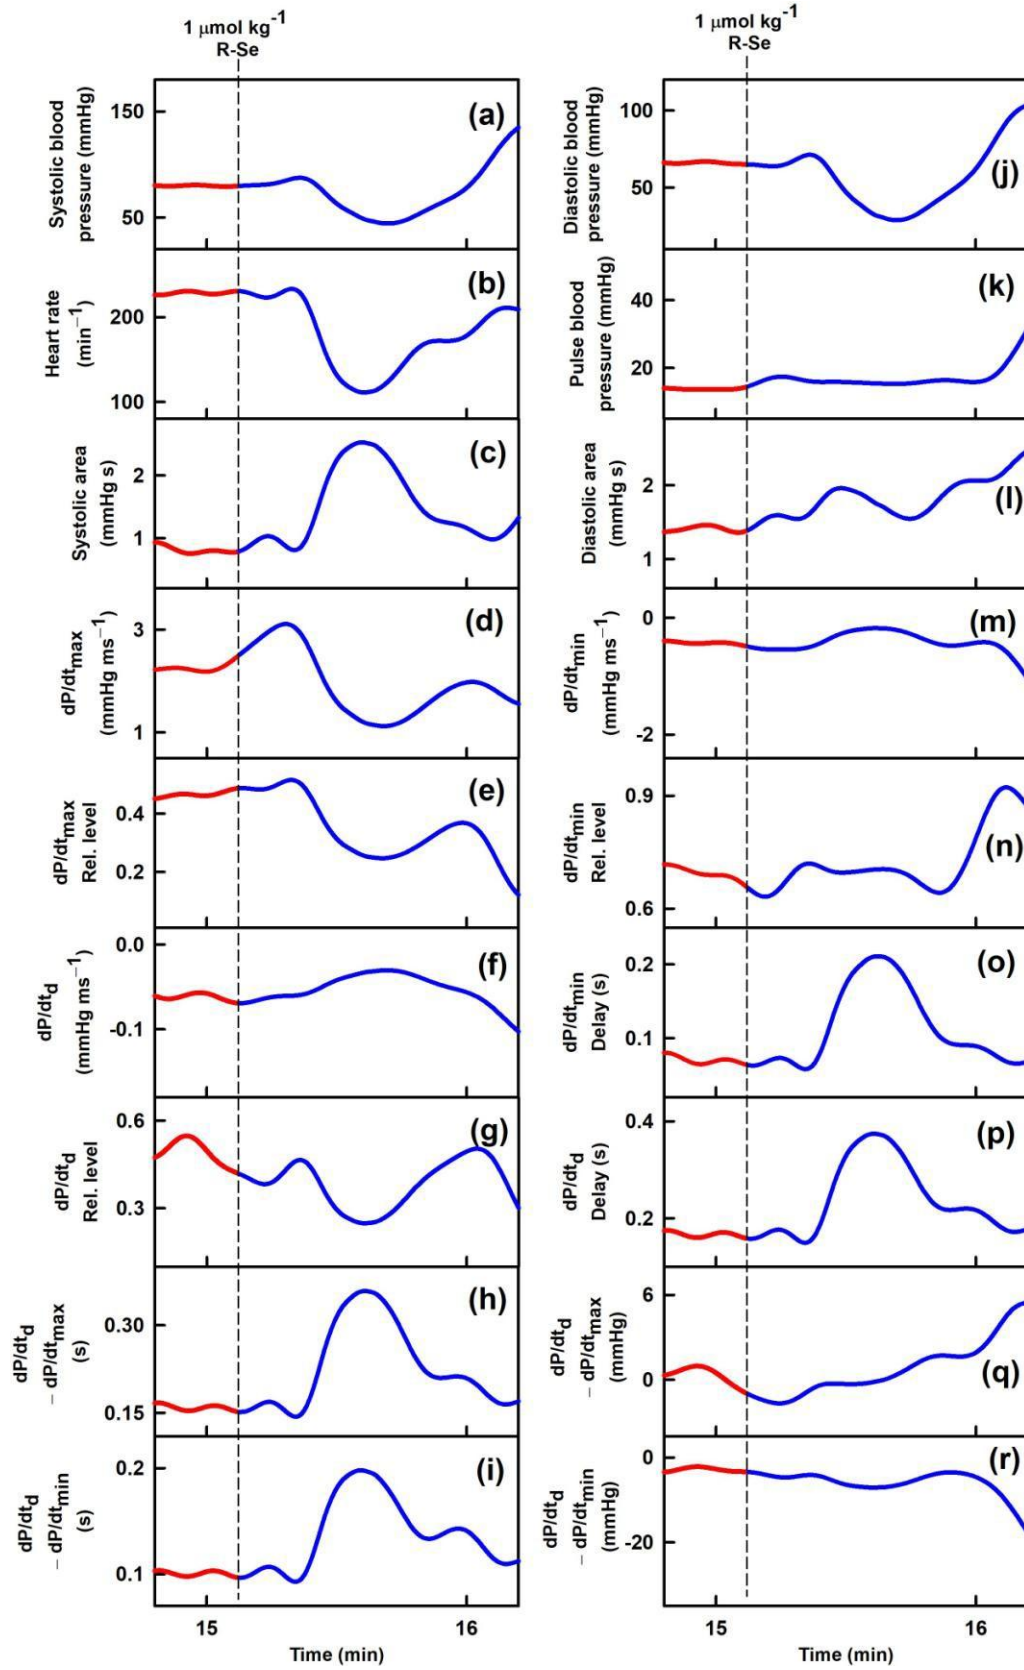

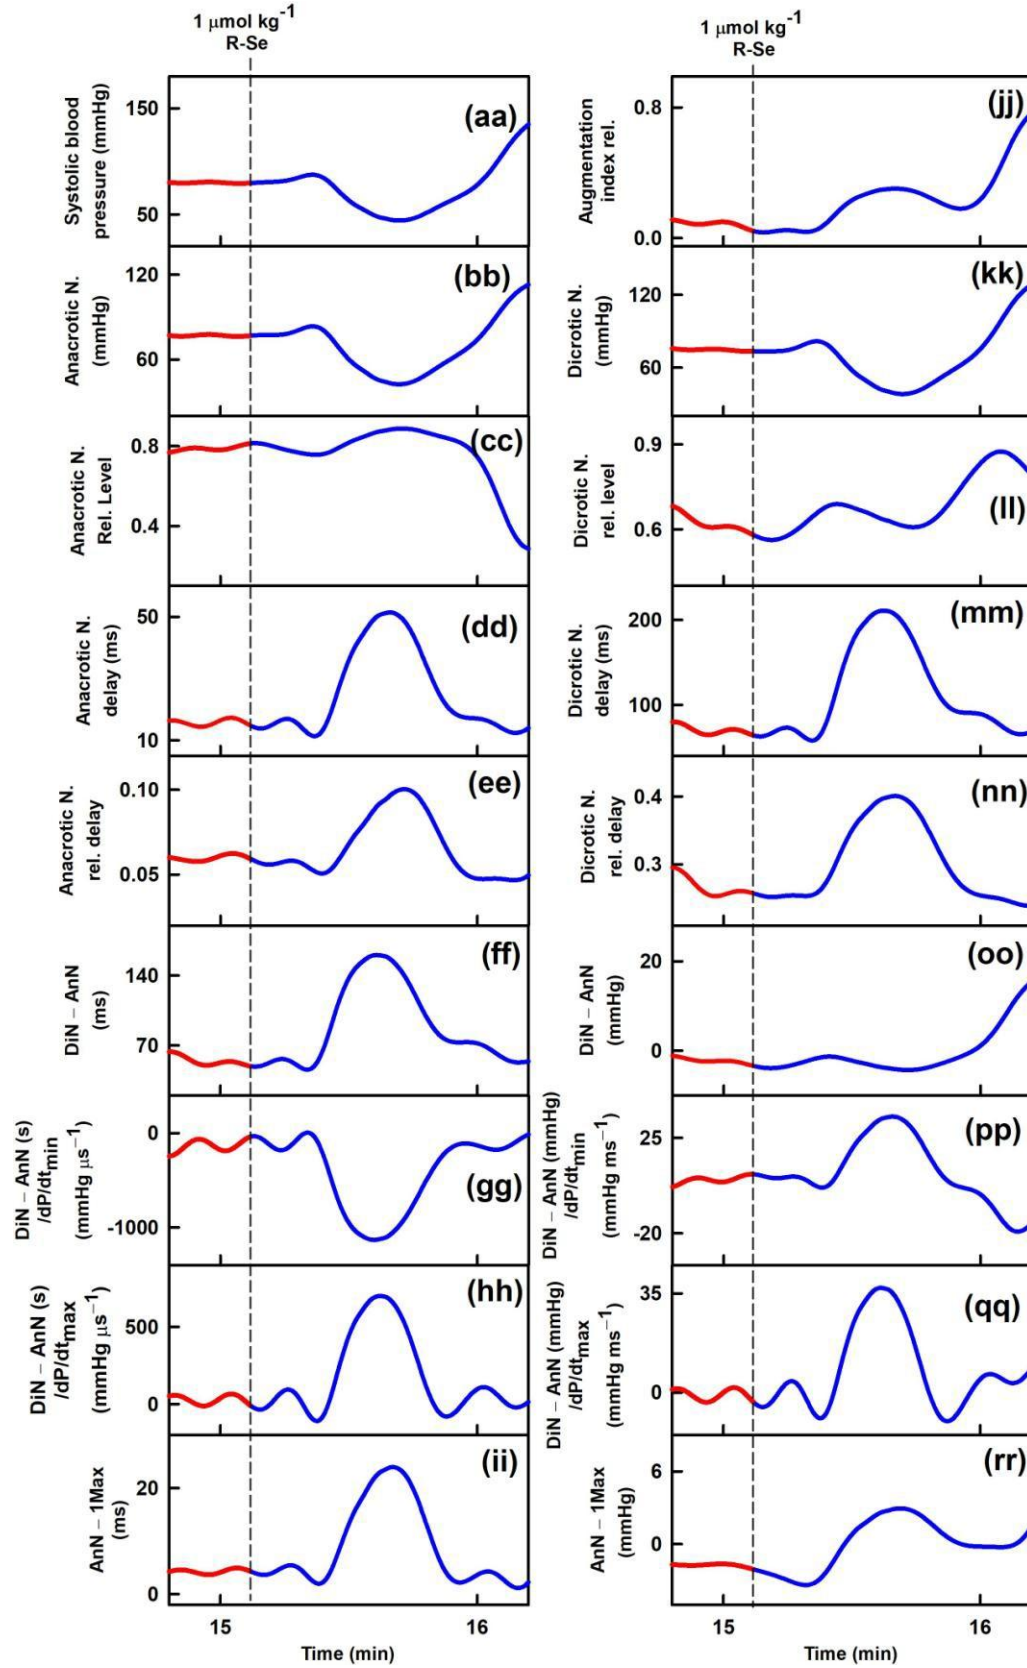

**Figure S2.** Time-dependent changes of 35 APW-Ps of anaesthetized rat before (red) and after IV bolus (15 s) administration of  $1 \mu\text{mol kg}^{-1}$  phthalic selenoanhydride (R-Se, blue). Vertical dash lines indicate start of R-Se administration. Definitions, units and abbreviations of APW-Ps evaluated from the APW are explained in [1,2] and briefly in Figure S1.

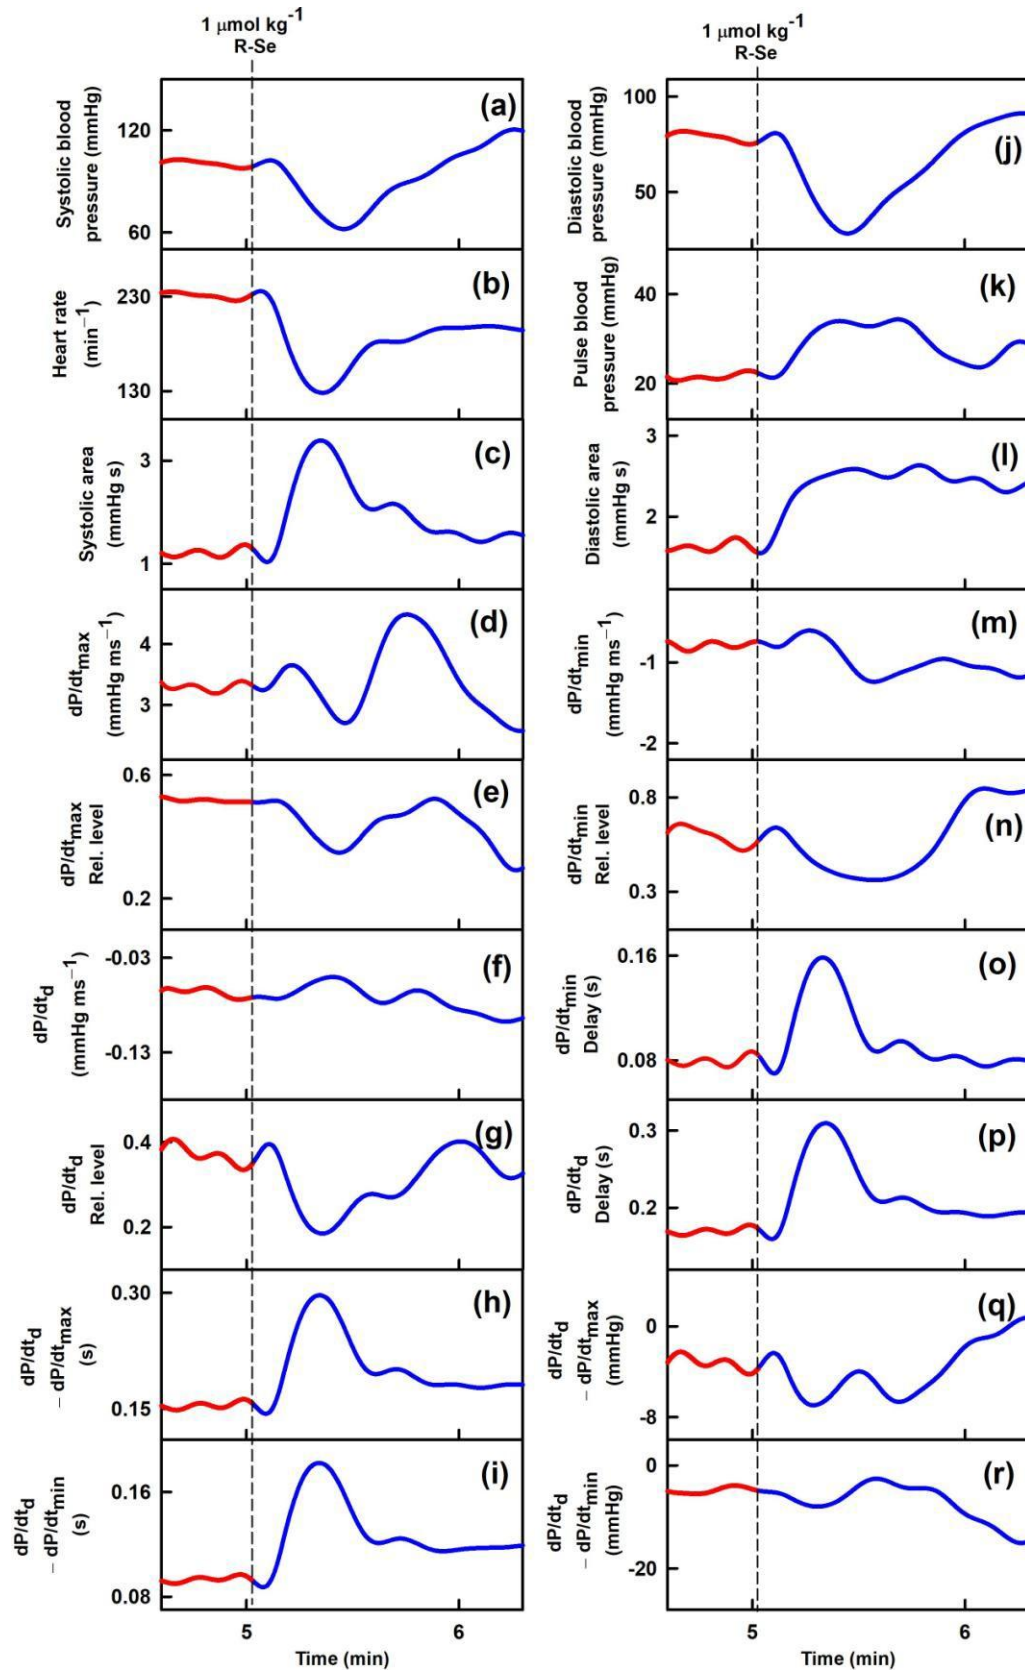



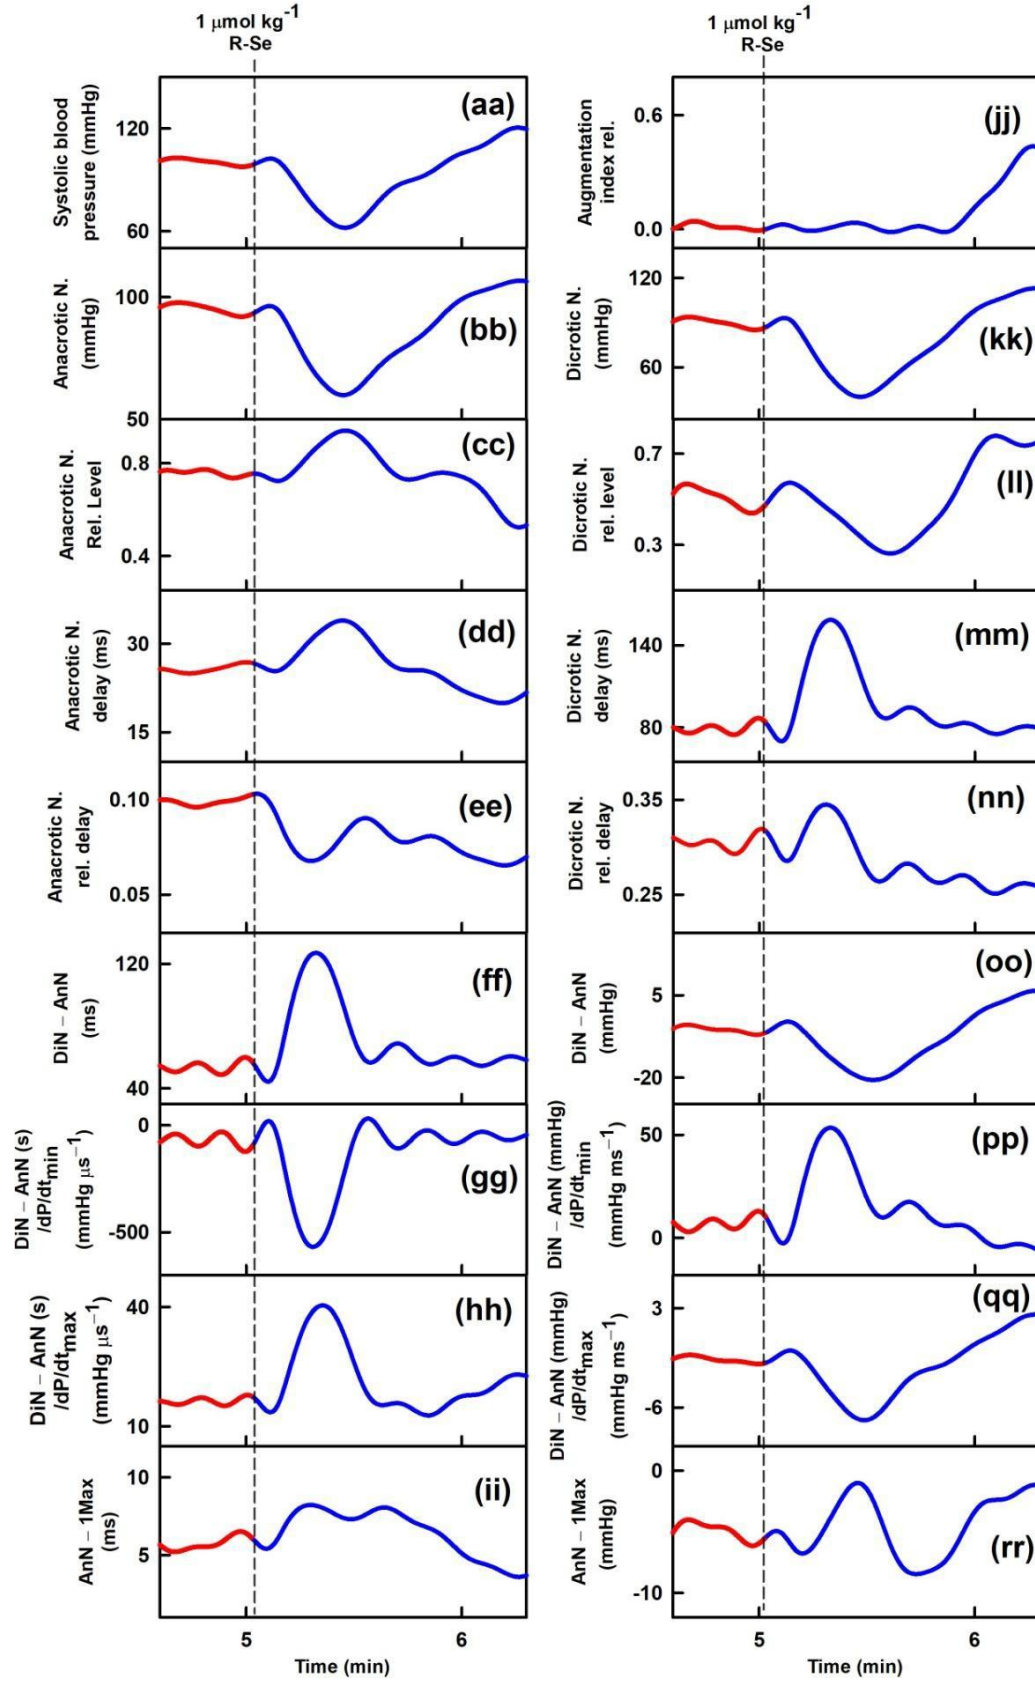

**Figure S3.** Time-dependent changes of 35 APW-Ps of anesthetized rat before (red) and after IV bolus (15 s) administration of  $1 \mu\text{mol kg}^{-1}$  R-Se (blue). Vertical dash lines indicate start of R-Se administration. Definitions, units and abbreviations of APW-Ps evaluated from the APW are explained in [1,2] and briefly in Figure S1.

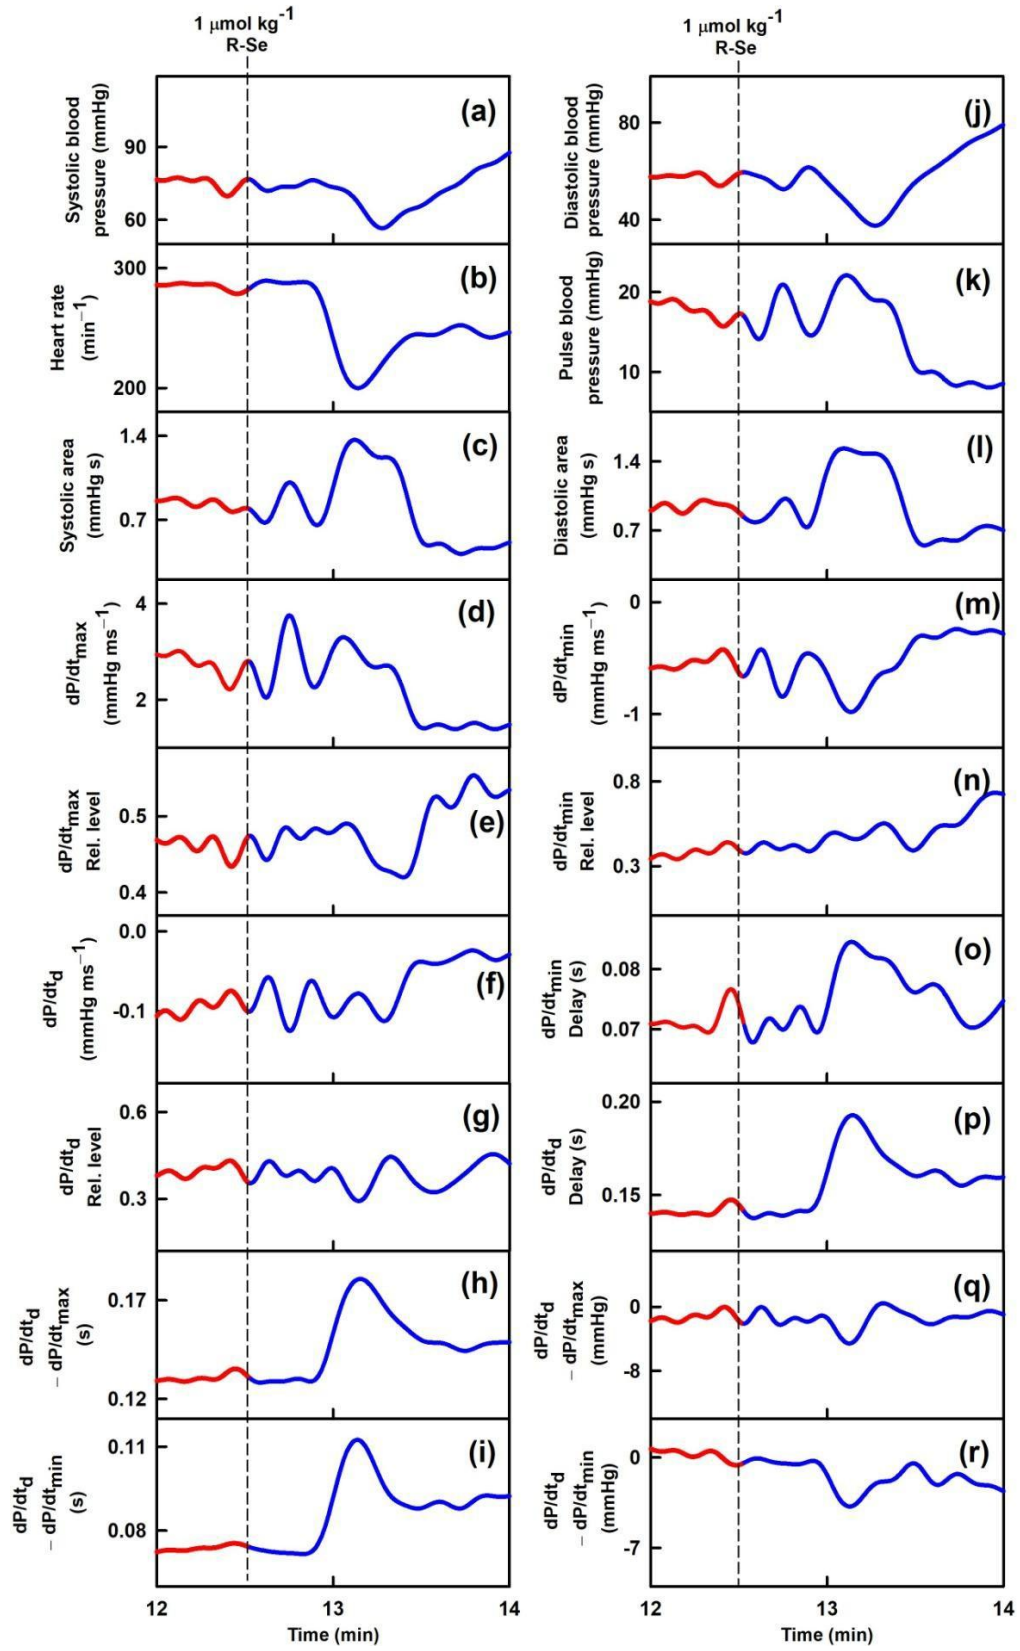



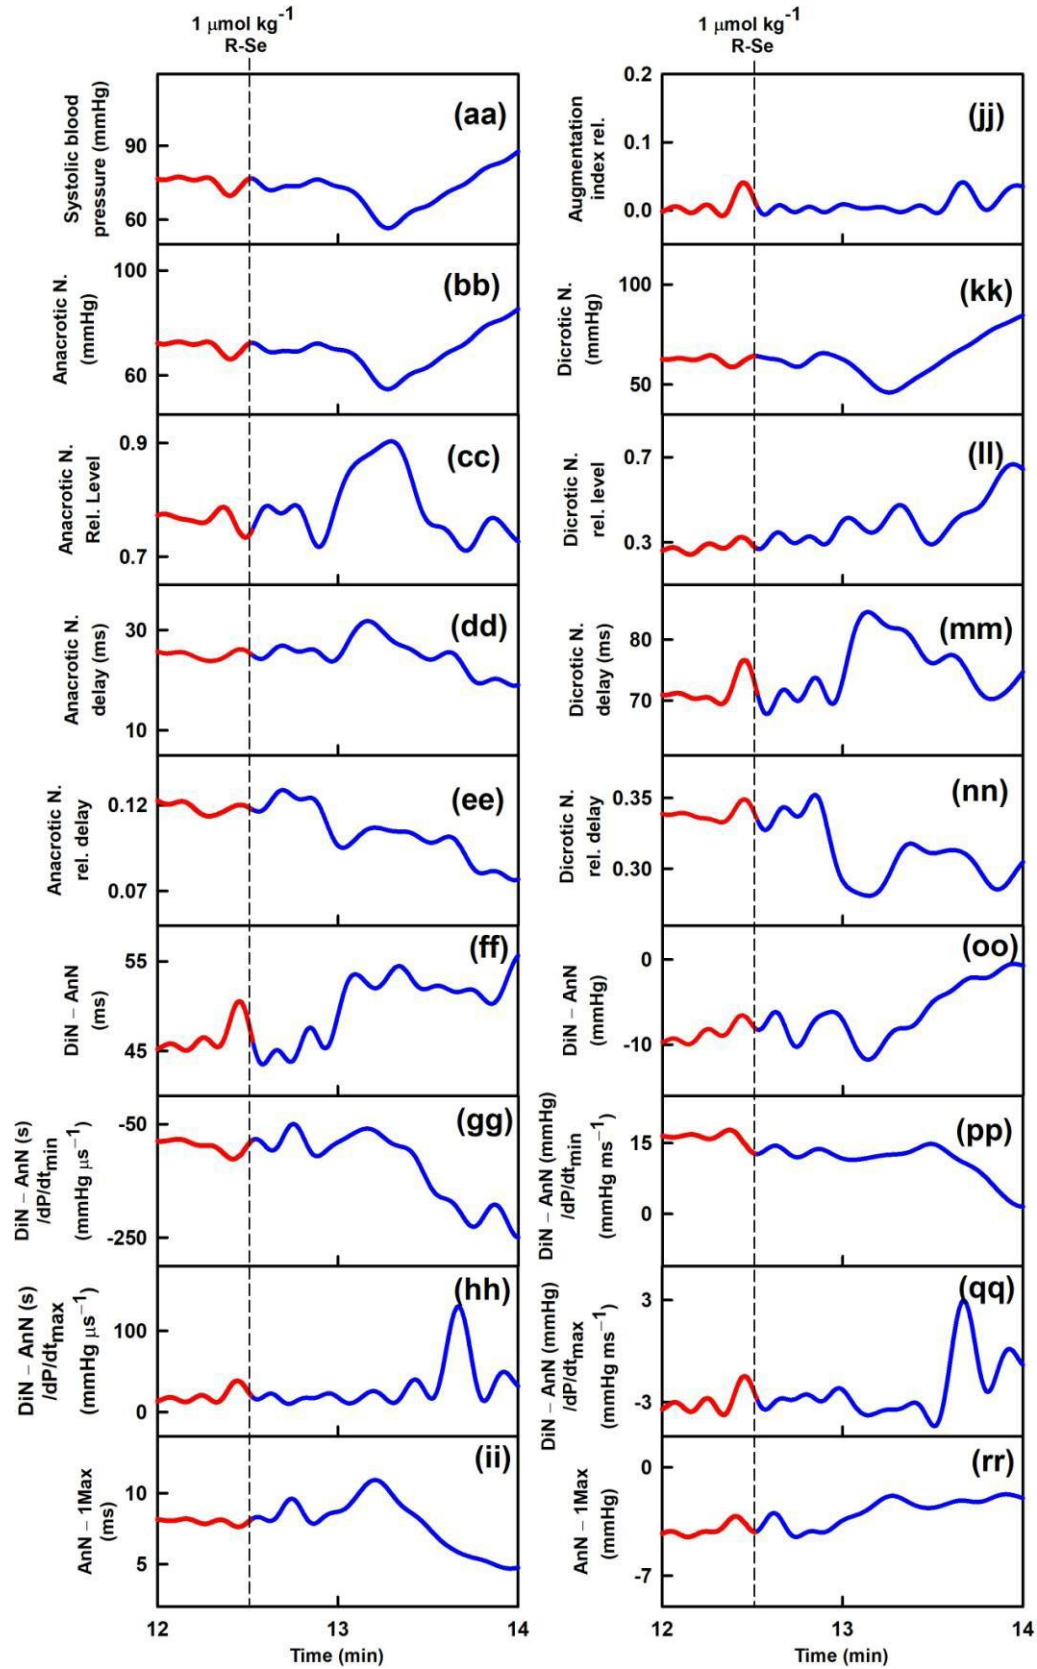

**Figure S4.** Time-dependent changes of 35 APW-Ps of anaesthetized rat before (red) and after IV bolus (15 s) administration of  $1 \mu\text{mol kg}^{-1}$  R-Se (blue). Vertical dash lines indicate start of R-Se administration. Definitions, units and abbreviations of APW-Ps evaluated from the APW are explained in [1,2] and briefly in Figure S1.

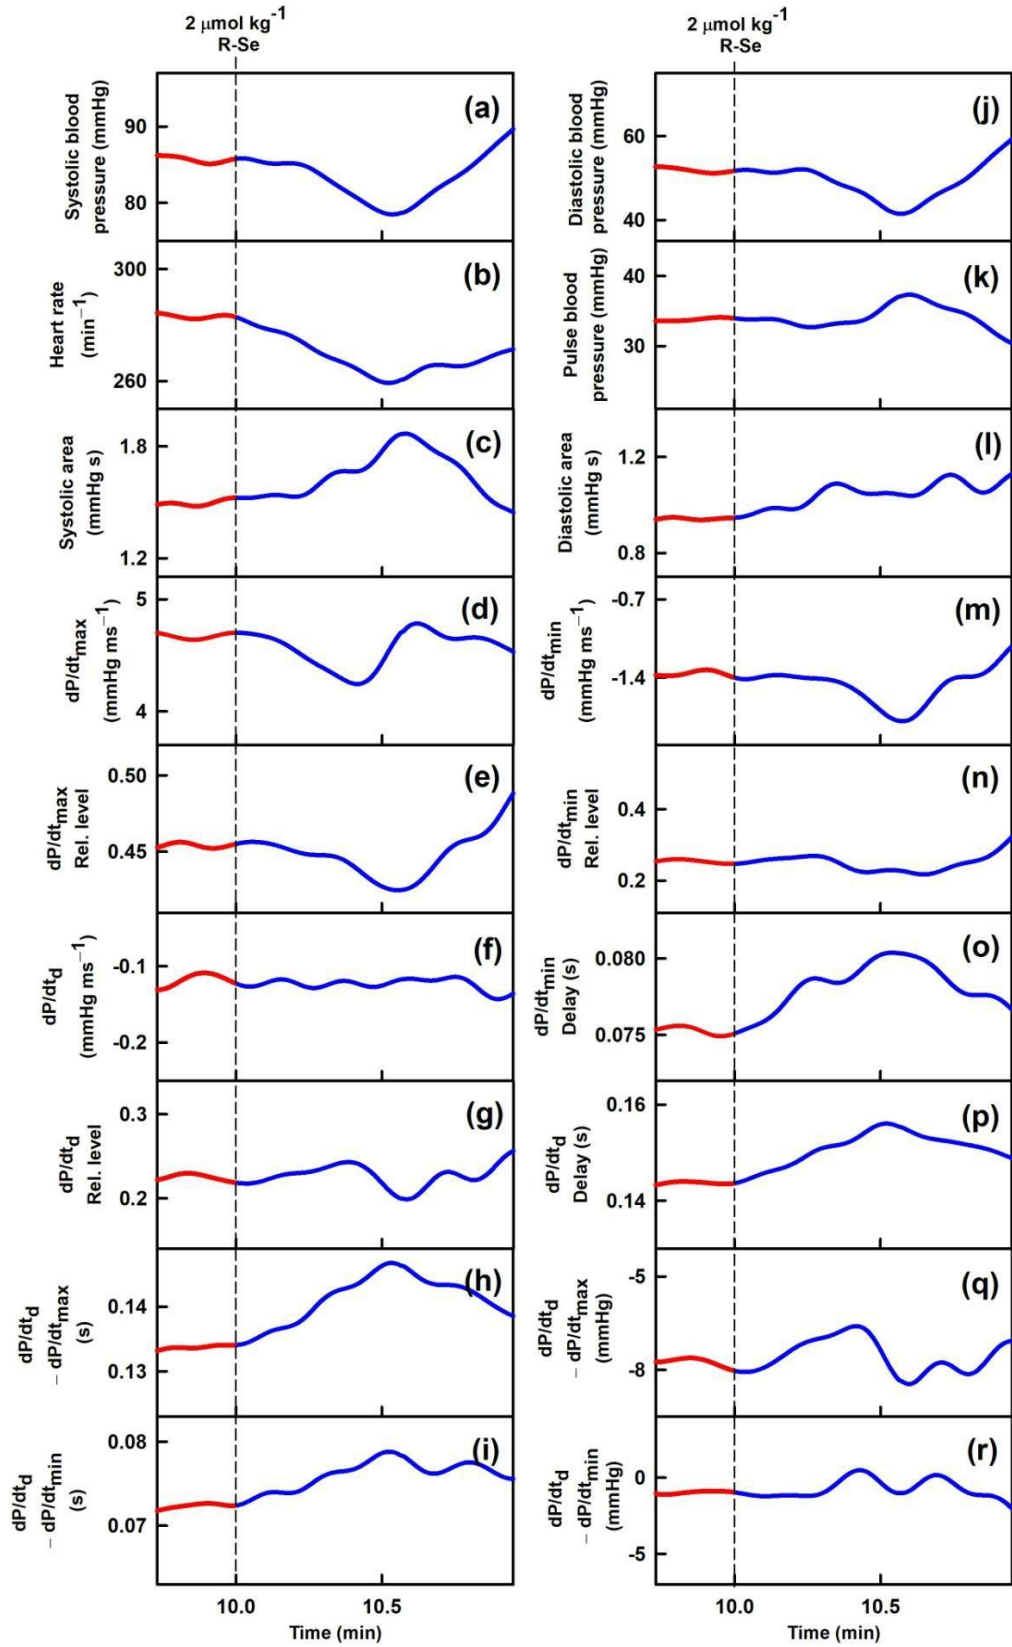

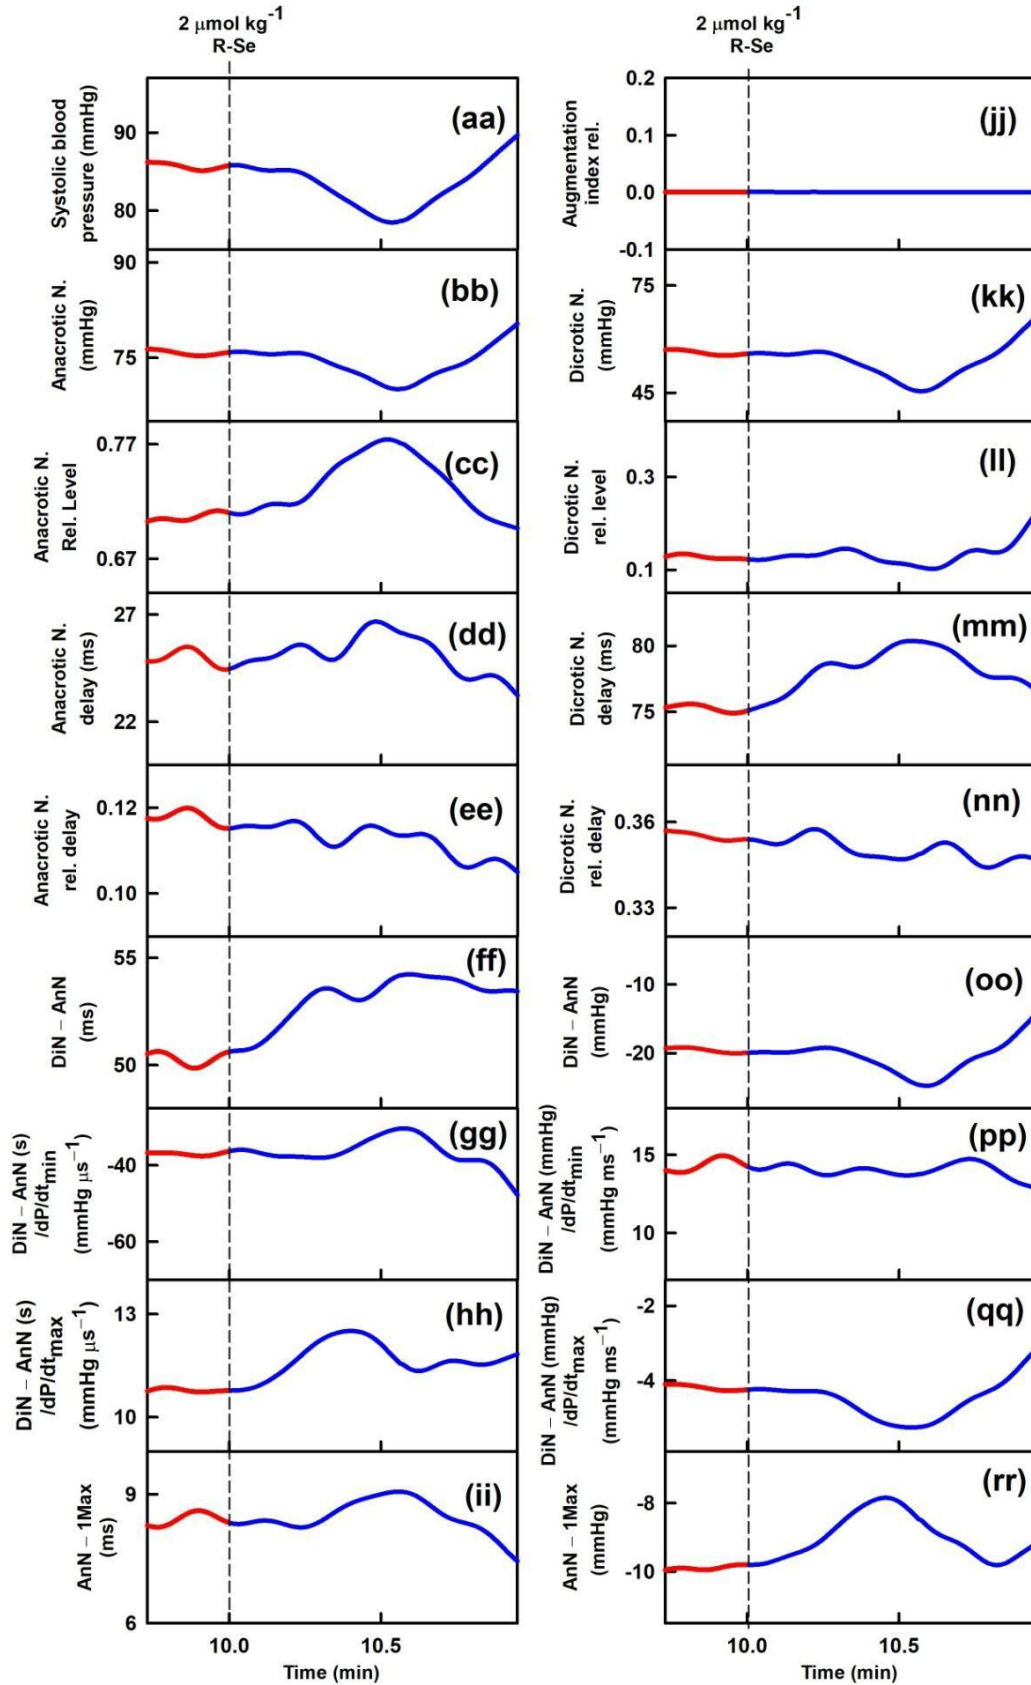

**Figure S5.** Time-dependent changes of 35 APW-Ps of anaesthetized rat before (red) and after IV bolus (15 s) administration of  $2 \mu\text{mol kg}^{-1}$  R-Se (blue). Vertical dash lines indicate start of R-Se administration. Definitions, units and abbreviations of APW-Ps evaluated from the APW are explained in [1,2] and briefly in Figure S1.

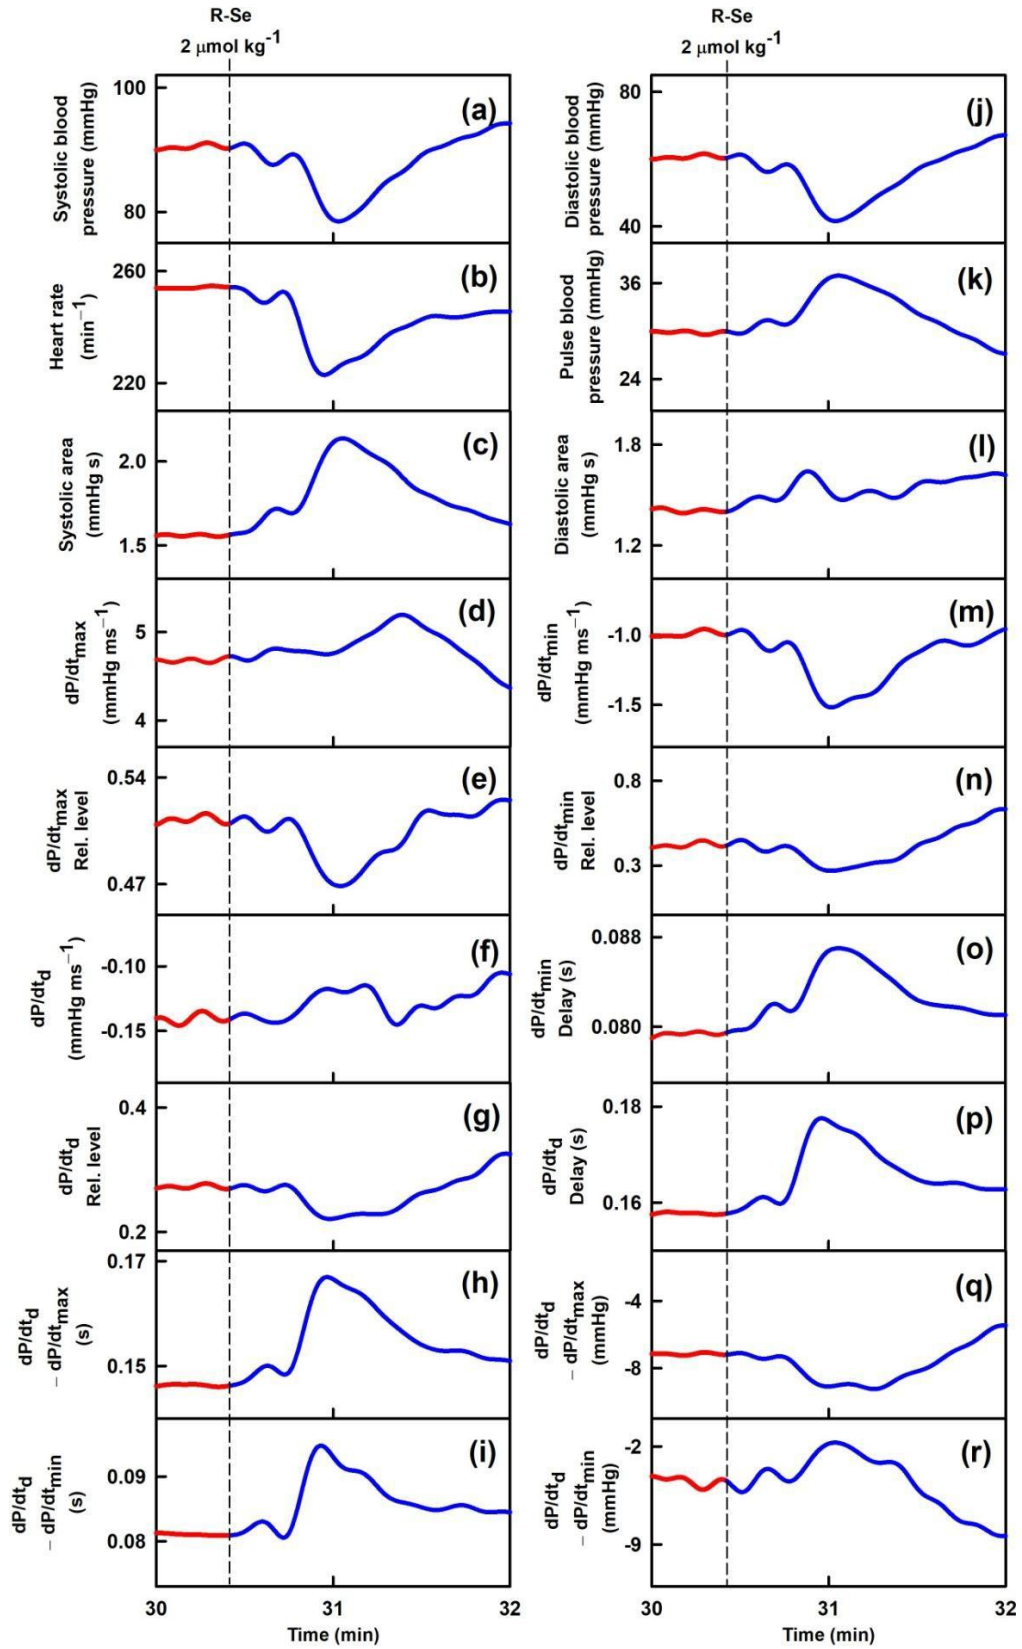



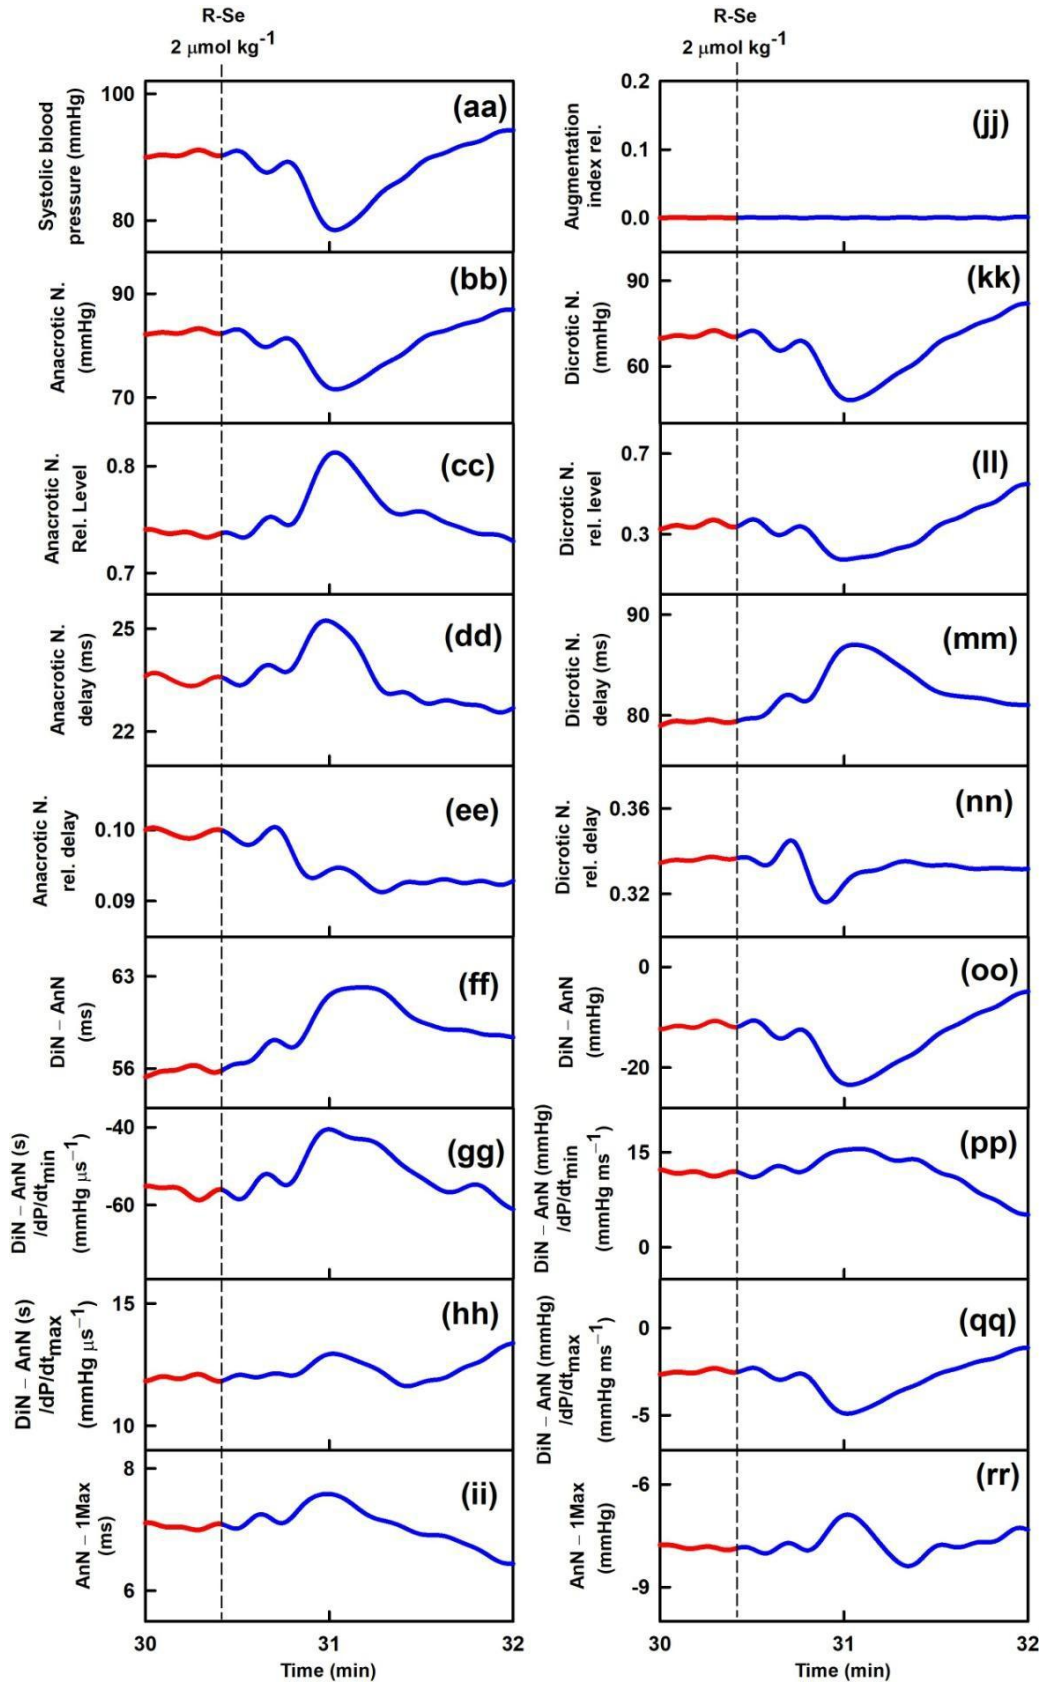

**Figure S6.** Time-dependent changes of 35 APW-Ps of anesthetized rat before (red) and after IV bolus (15 s) administration of 2  $\mu\text{mol kg}^{-1}$  R-Se (blue). Vertical dash lines indicate start of R-Se administration. Definitions, units and abbreviations of APW-Ps evaluated from the APW are explained in [1,2] and briefly in Figure S1.

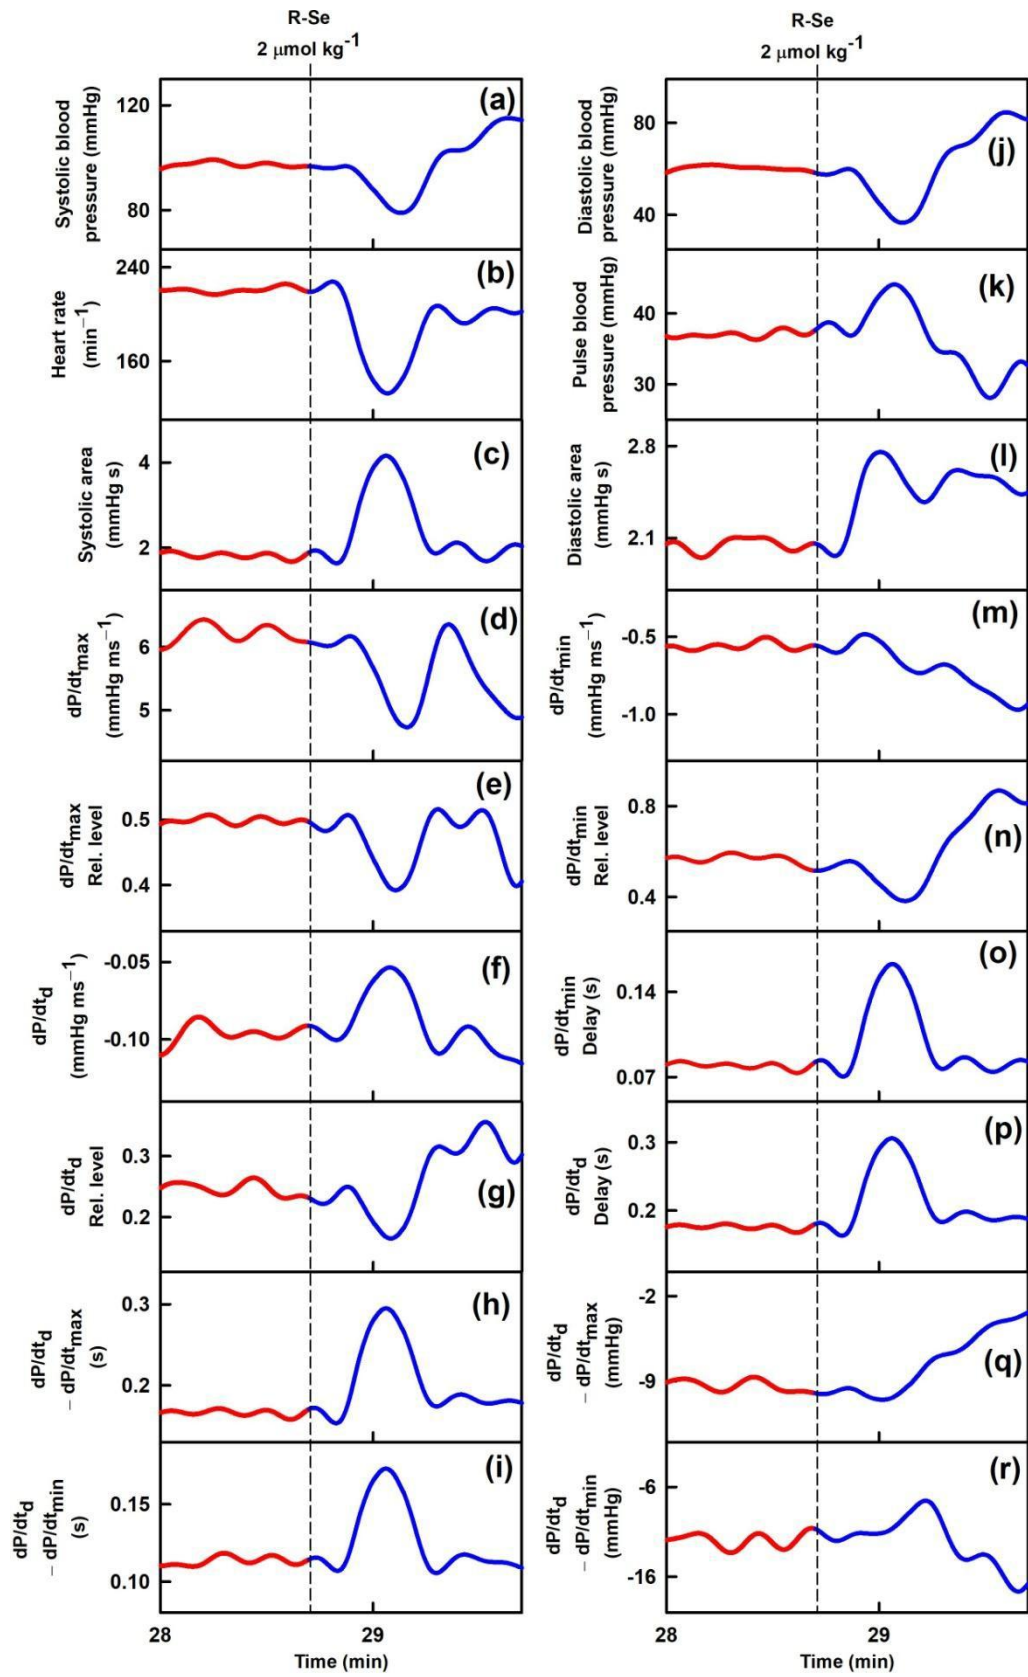



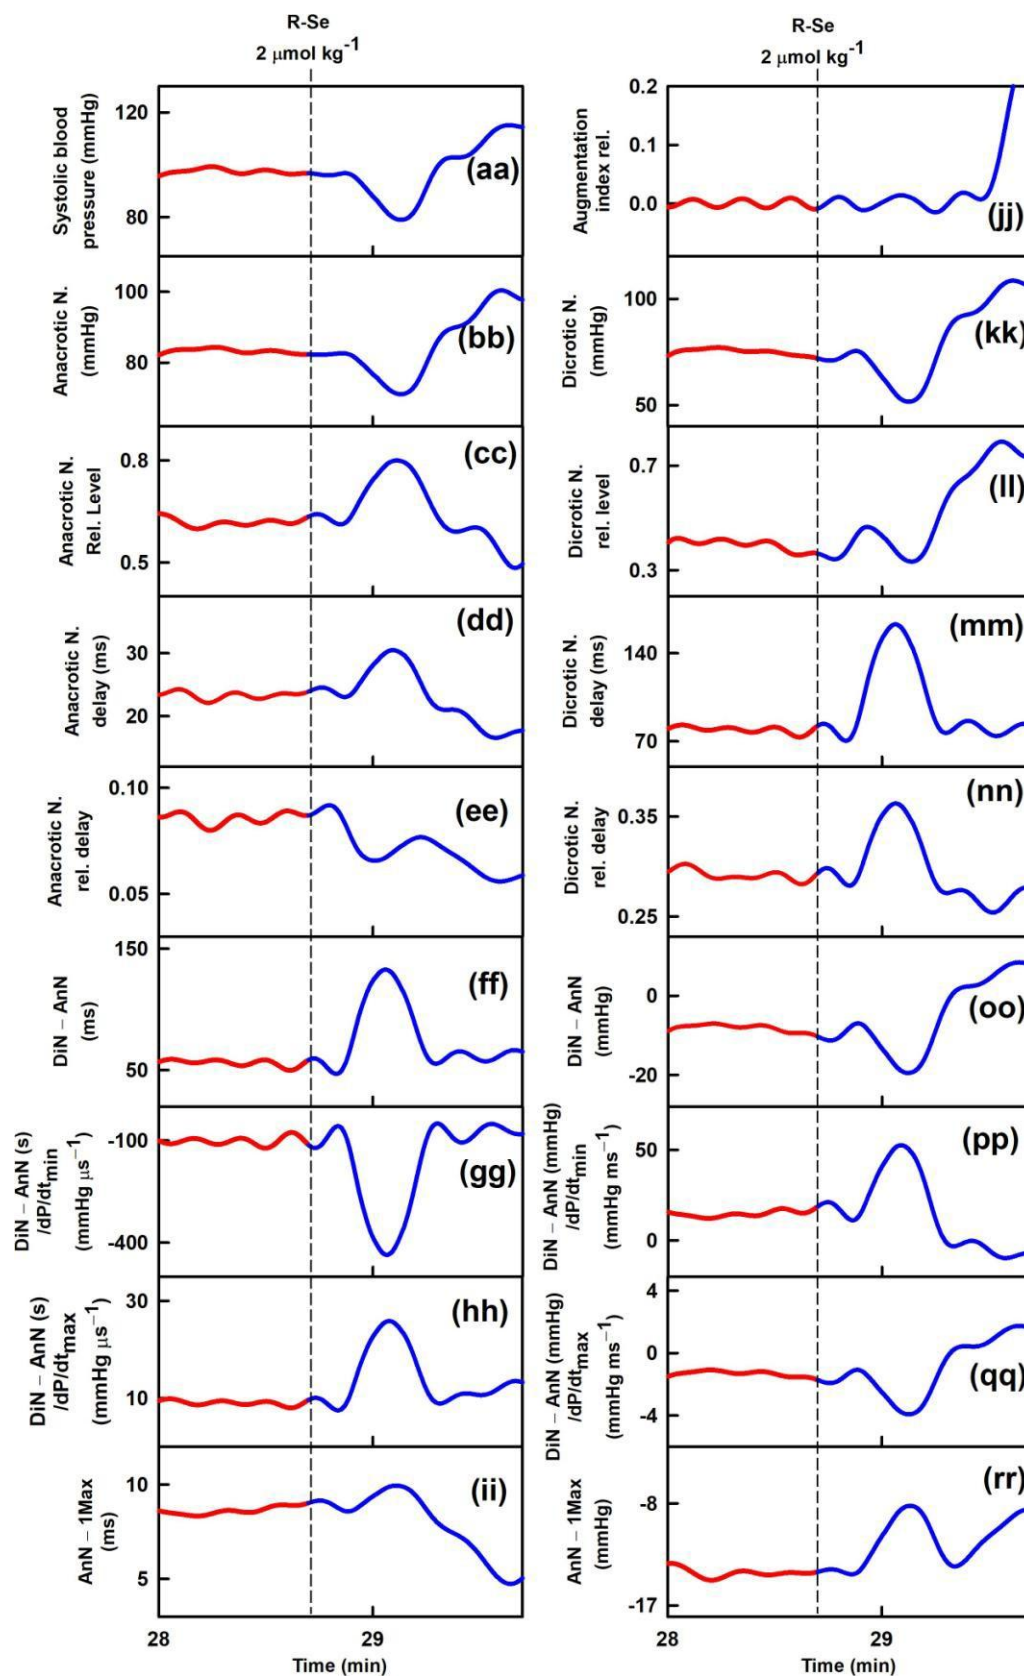

**Figure S7.** Time-dependent changes of 35 APW-Ps of anaesthetized rat before (red) and after IV bolus (15 s) administration of 2  $\mu\text{mol kg}^{-1}$  R-Se (blue). Vertical dash lines indicate start of R-Se administration. Definitions, units and abbreviations of APW-Ps evaluated from the APW are explained in [1,2] and briefly in Figure S1.

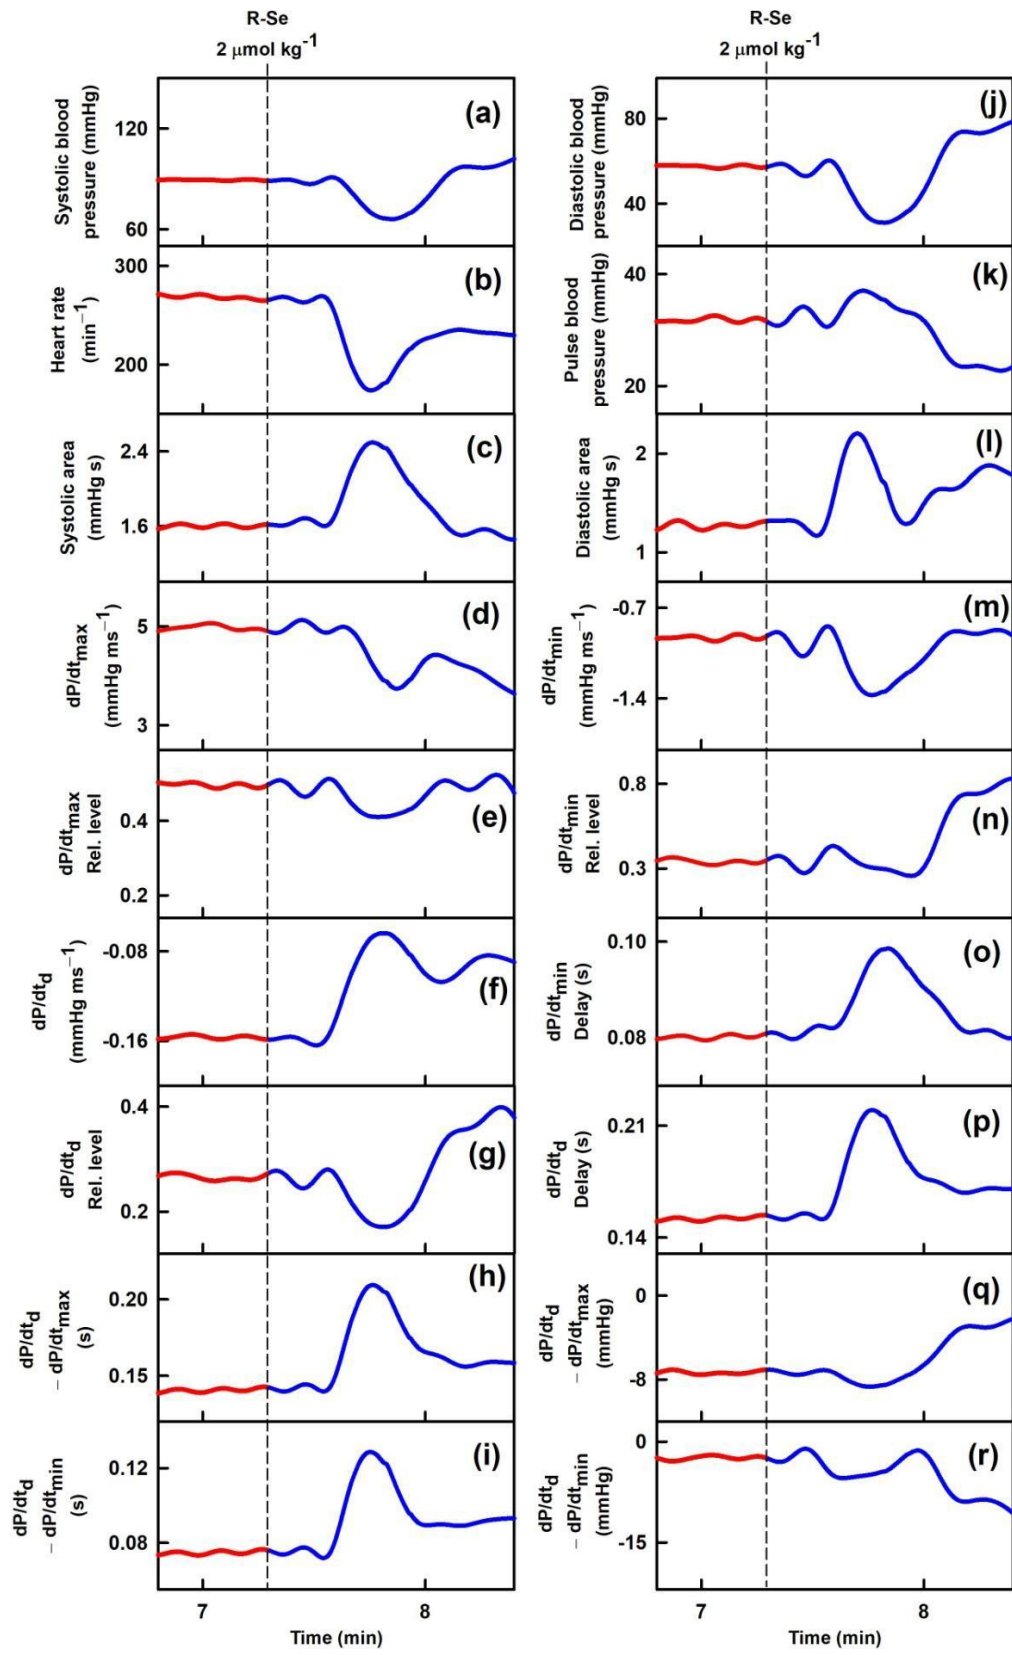

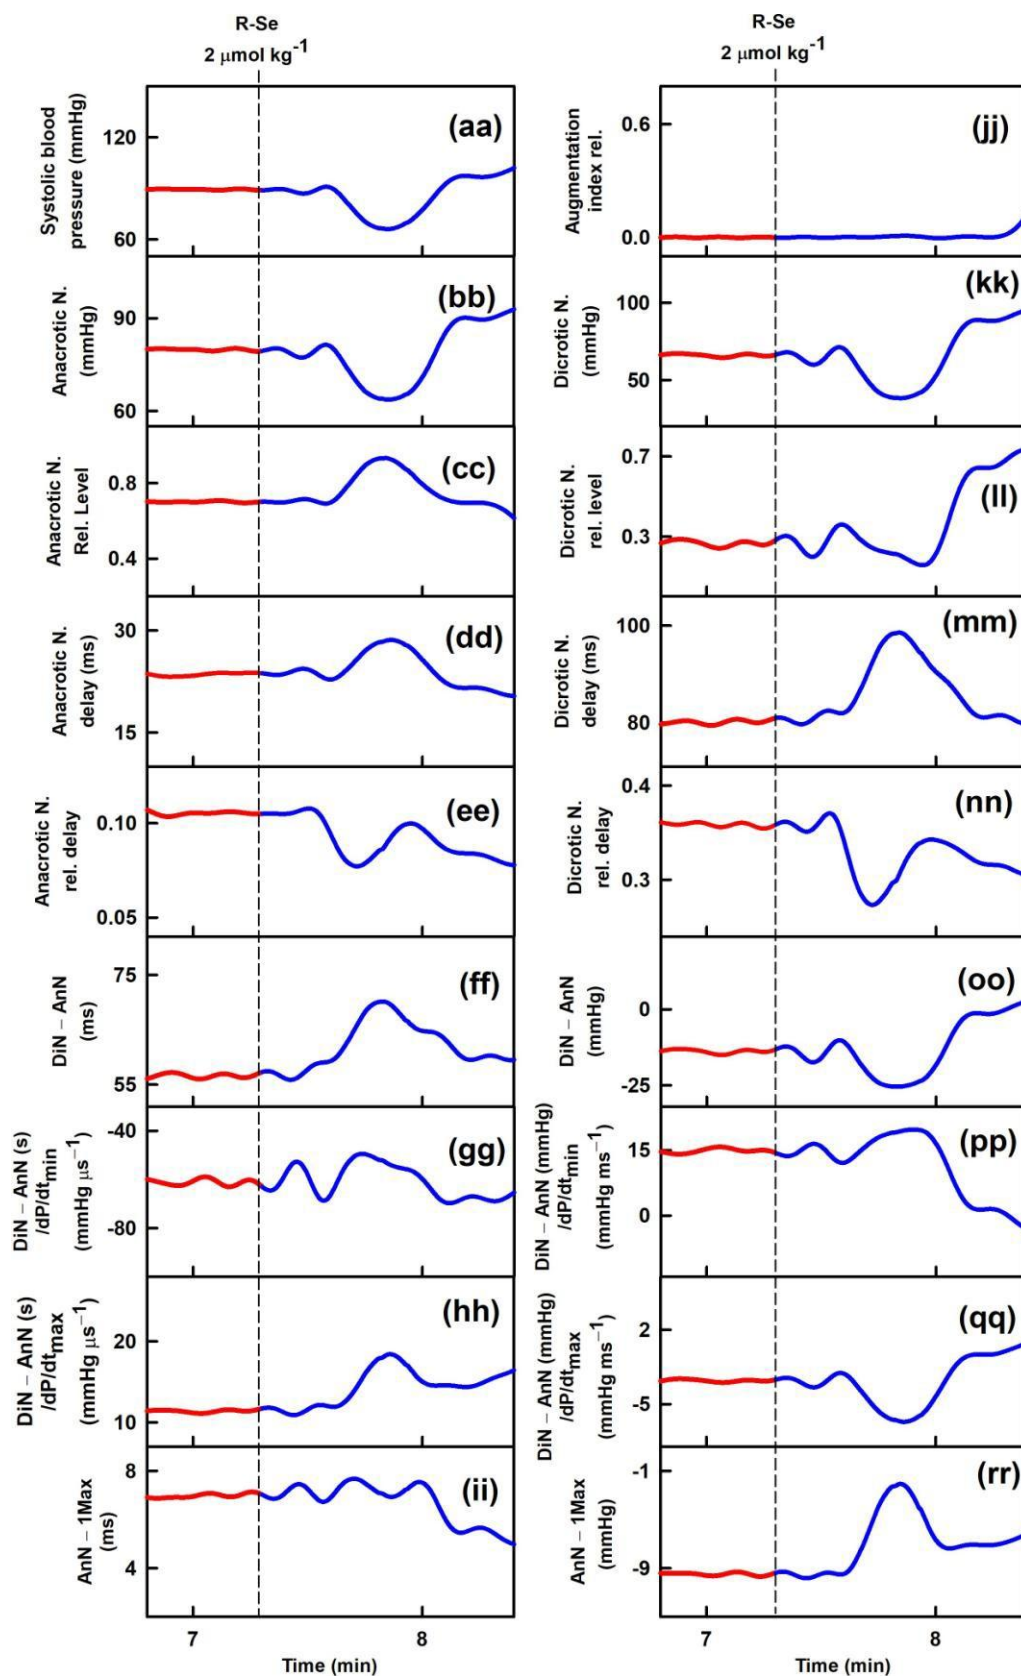

**Figure S8.** Time-dependent changes of 35 APW-Ps of anesthetized rat before (red) and after IV bolus (15 s) administration of  $2 \mu\text{mol kg}^{-1}$  R-Se (blue). Vertical dash lines indicate start of R-Se administration. Definitions, units and abbreviations of APW-Ps evaluated from the APW are explained in [1,2] and briefly in Figure S1.

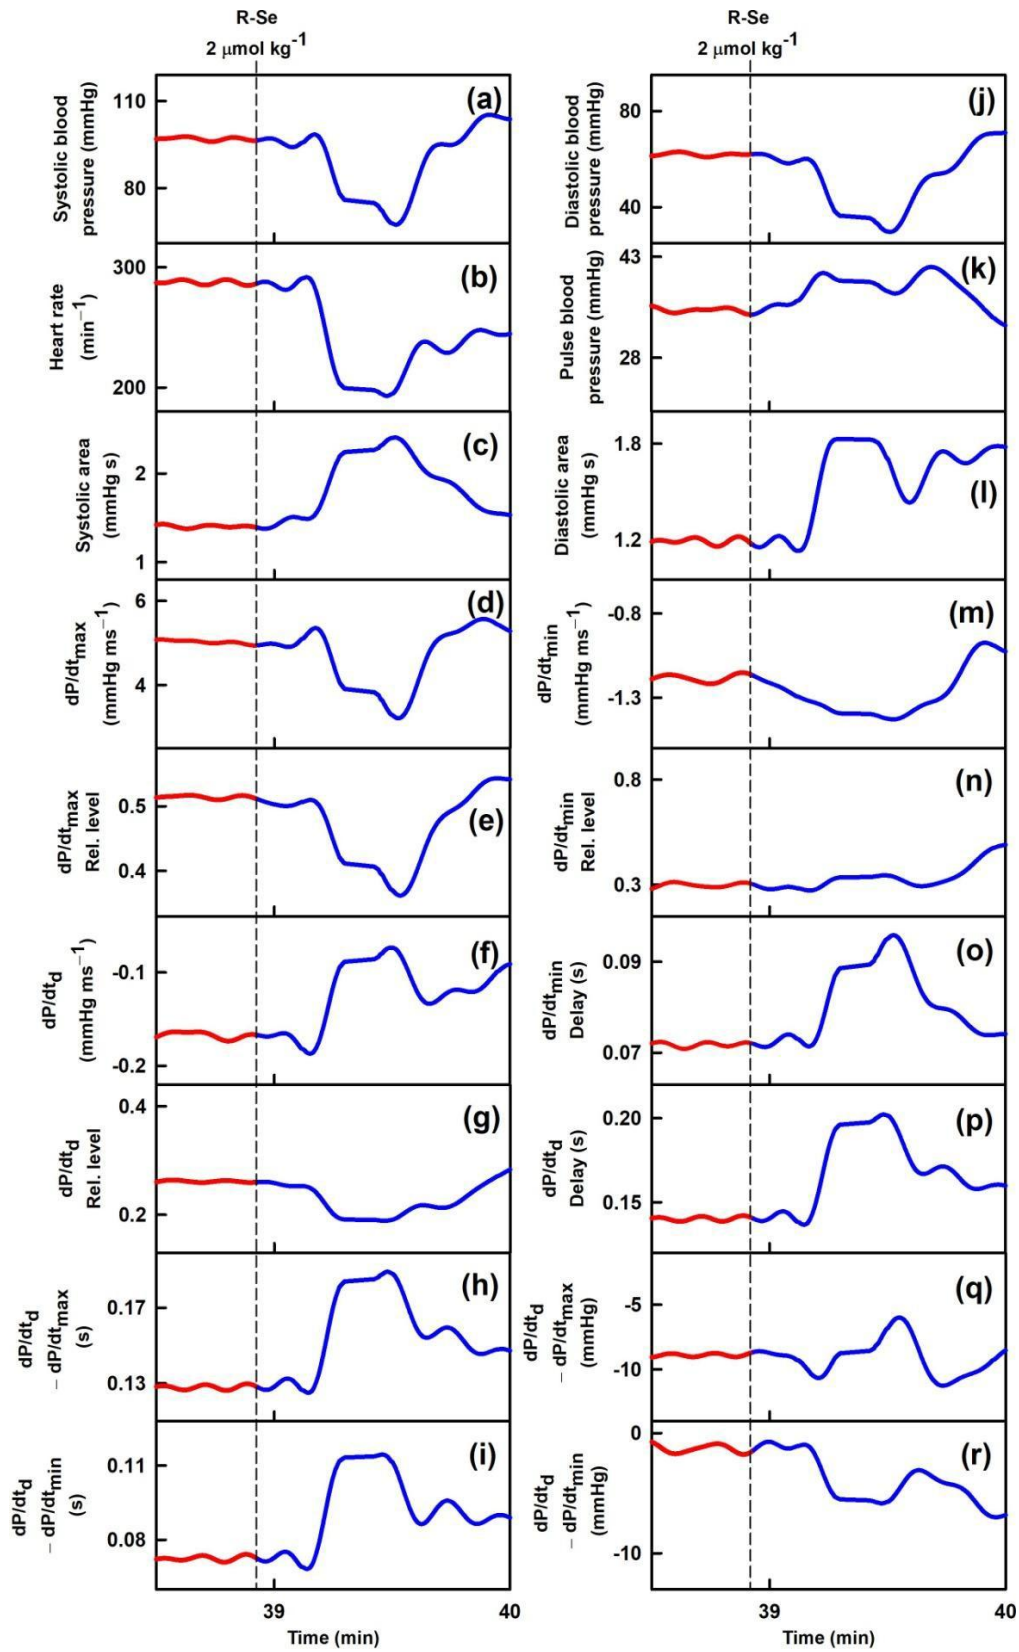



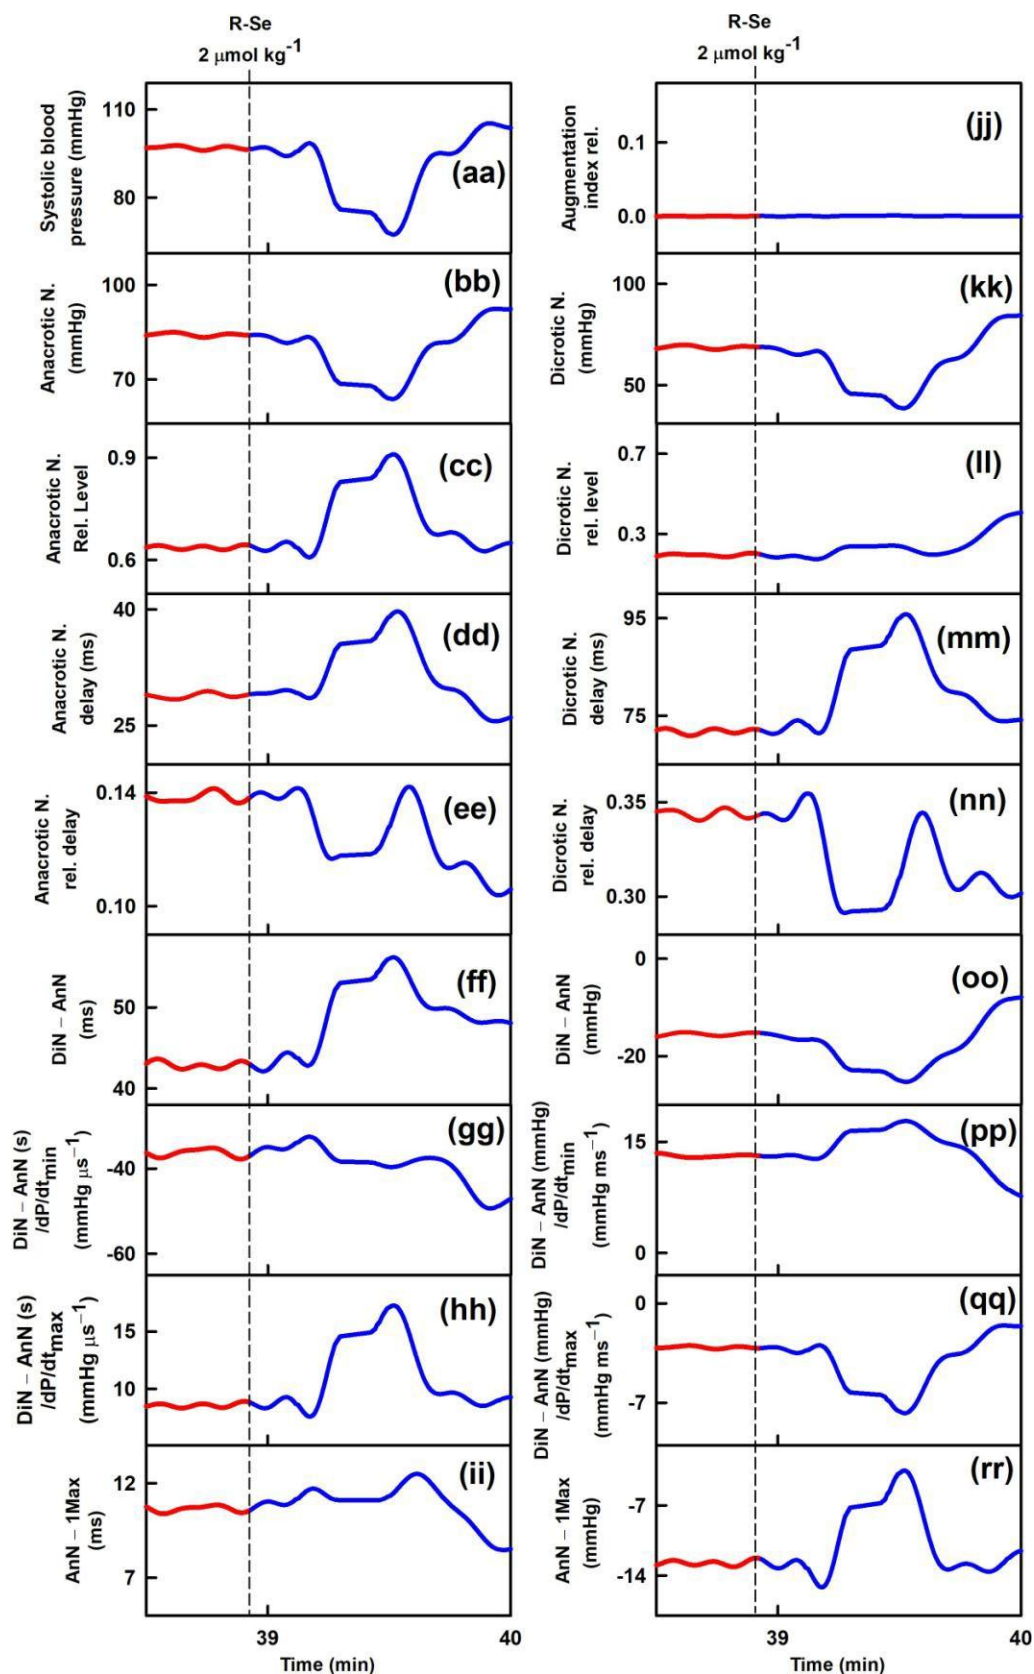

**Figure S9.** Time-dependent changes of 35 APW-Ps of anesthetized rat before (red) and after IV bolus (15 s) administration of  $2 \mu\text{mol kg}^{-1}$  R-Se (blue). Vertical dash lines indicate start of R-Se administration. Definitions, units and abbreviations of APW-Ps evaluated from the APW are explained in [1,2] and briefly in Figure S1.

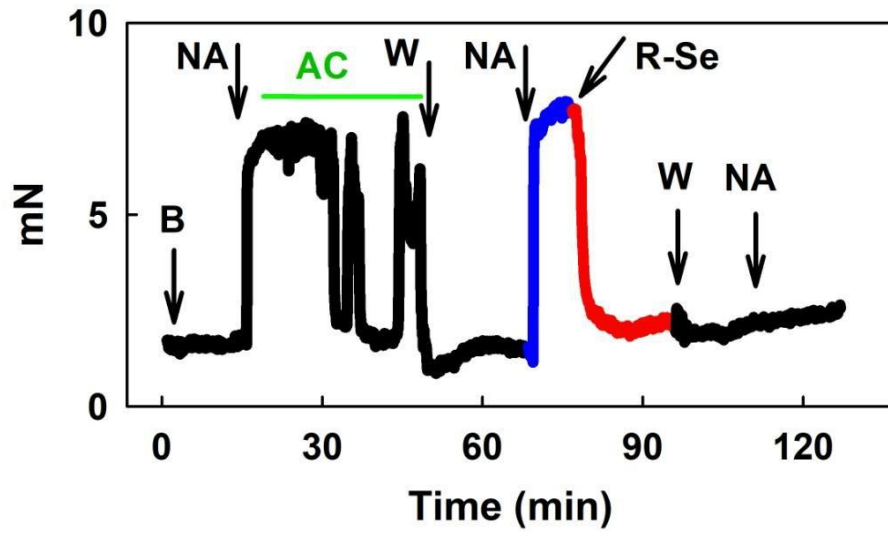

**Figure S10.** Original recording of the vascular reactivity of the mesenteric artery. **B** indicates baseline. Vascular segment was pre-contracted with noradrenaline (**NA**,  $10 \mu\text{mol L}^{-1}$ ). Acetylcholine was added in a cumulative manner (**AC**,  $1 \text{ nmol L}^{-1}$  -  $10 \mu\text{mol L}^{-1}$ ). The vessel was washed four times (**W**) and re-contracted with **NA**. After stabilization of the tension, **R-Se** ( $12.5 \mu\text{mol L}^{-1}$ ) was applied. The vessel was washed four times again (**W**) and **NA** ( $10 \mu\text{mol L}^{-1}$ ) was applied.



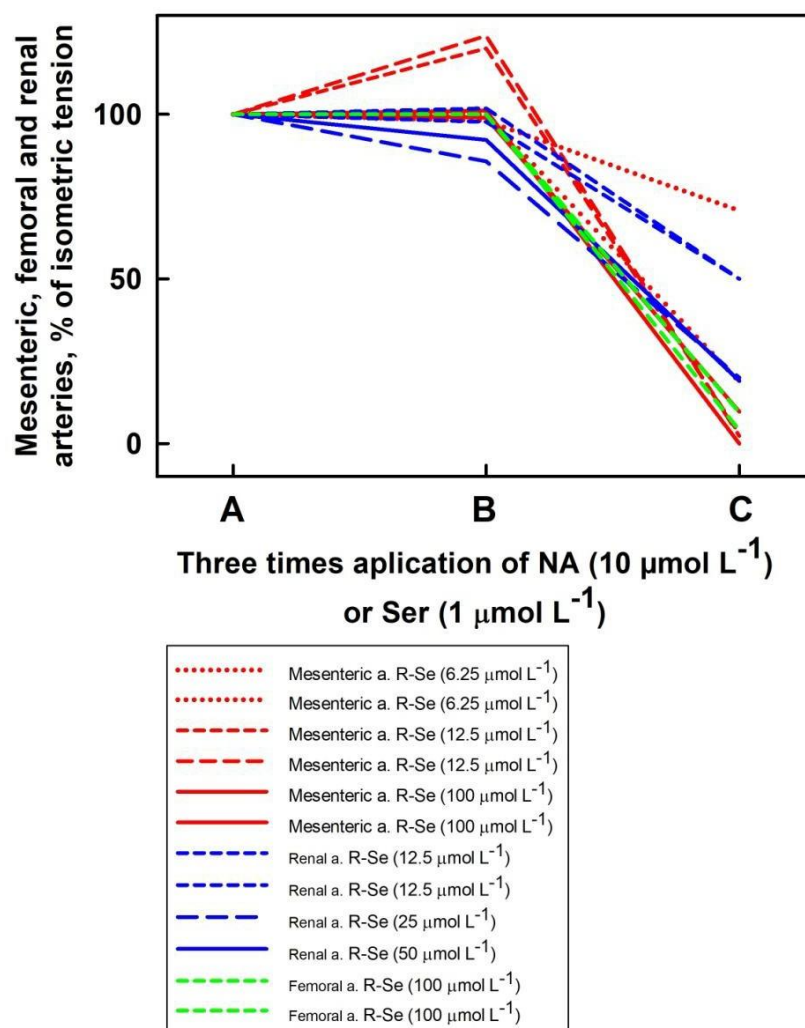

**Figure S11.** The comparison of noradrenaline (NA,  $10 \mu\text{mol L}^{-1}$ ) or serotonin (Ser,  $1 \mu\text{mol L}^{-1}$ ) potency to increase tension of the mesenteric, renal and femoral arteries during control measurement of vascular endothelium function (A), before application of R-Se (B) and after wash out of R-Se (C). For details see Figure S10.

## References

1. Kurakova, L.; Misak, A.; Tomasova, L.; Cacanyiova, S.; Berenyiova, A.; Ondriasova, E.; Balis, P.; Grman, M.; Ondrias, K. Mathematical relationships of patterns of 35 rat haemodynamic parameters for conditions of hypertension resulting from decreased nitric oxide bioavailability. *Exp. Physiol.* **2020**, *105*, 312-334.
2. Tomasova, L.; Grman, M.; Misak, A.; Kurakova, L.; Ondriasova, E.; Ondrias, K. Cardiovascular "Patterns" of H<sub>2</sub>S and SSNO-Mix Evaluated from 35 Rat Hemodynamic Parameters. *Biomolecules* **2021**, *11*, 293.
